# Supplementary material for: Fe/P dual doping boosts the activity and durability of CoS2 polycrystalline nanowires for hydrogen evolution
Source: Royal Society of Chemistry journal article supplement (doi:10.1039/c8ta12269e), 2019-01-01
Supplement: c8ta12269e1.pdf [file c8ta12269e1.pdf]

## Electronic Supplementary Information

### Fe/P Dual Doping Boosts the Activity and Durability of CoS<sub>2</sub> Polycrystalline

#### Nanowires for Hydrogen Evolution

*Yang-Yang Zhang,<sup>a,b</sup> Xing Zhang,<sup>\*b,c</sup> Ze-Yuan Wu,<sup>b,c</sup> Bin-Bin Zhang,<sup>a,b</sup> Yun Zhang,<sup>b</sup>*

*Wen-Jie Jiang,<sup>b</sup> Yu-Guo Yang,<sup>a</sup> Qing-Hua Kong,<sup>\*a</sup> and Jin-Song Hu,<sup>\*b,c</sup>*

- a. School of Science, Beijing Jiaotong University, Beijing 100044, China.
- b. Beijing National Laboratory for Molecular Sciences (BNLMS), CAS Key Laboratory of Molecular Nanostructure and Nanotechnology, CAS Research/Education Center for Excellence in Molecule Science, Institute of Chemistry, Chinese Academy of Sciences, Beijing 100190, China.
- c. University of Chinese Academy of Sciences, Beijing 100049, China.

\*E-mail: zhangxing@iccas.ac.cn; qhkong@bjtu.edu.cn; hujs@iccas.ac.cn

This file includes Fig. S1-S8 and Table S1-S3.

## **Experimental Method**

**Preparation of Fe-CoS<sub>2</sub> PCNW.** Carbon cloth (CC, Wuhan Instrument, Wuhan) was carefully cleaned with concentrated HNO<sub>3</sub> to remove impurities on surface, then rinsed by deionized water and ethanol before use. 1.5 mmol cobalt nitrate hexahydrate (Acros Organics 99+%), 0.15 mmol ferric chloride (Alfa Aesar 98+%), 3.78 mmol ammonium fluoride (Alfa Aesar 98.0%), and 7.5 mmol urea (Acros Organics 99%) were dissolved in 40 mL deionized water. After stirring for 30 min, the solution was transferred into a 50 mL Teflon-lined stainless-steel autoclave with a piece of clean CC and maintained at 120 °C for 6 h. After the autoclave cooled down to room temperature, the sample was collected and washed with water and ethanol several times and dried at 60 °C, followed by annealing at 300 °C for 2 h in air to obtain the Fe-Co<sub>3</sub>O<sub>4</sub>/CC precursor. To convert Fe-Co<sub>3</sub>O<sub>4</sub> into Fe-CoS<sub>2</sub>, Fe-Co<sub>3</sub>O<sub>4</sub>/CC in a quartz boat was loaded in a quartz tube which was positioned at the downstream of a two-zone furnace. Sulfur powder (0.5 g) in another quartz boat was then positioned in the tube at the upstream of the furnace. The temperature for downstream zone was set at 400 °C with a ramp rate of 3 °C·min<sup>-1</sup>, while upstream zone was set at 400 °C with a ramp rate of 3 °C·min<sup>-1</sup>. After 2 h under Ar (100 sccm) atmosphere, the Fe-CoS<sub>2</sub>/CC was obtained.

**Preparation of Fe/P-CoS<sub>2</sub> PCNW.** The prepared Fe-CoS<sub>2</sub>/CC was then thermally phosphorized to prepare Fe/P-CoS<sub>2</sub>/CC through a vapor phase phosphorization process in a tube furnace. The NaH<sub>2</sub>PO<sub>2</sub>·H<sub>2</sub>O (Alfa Aesar 97+%) was put in the upstream side of the furnace and heated to 400 °C for 1 h under a steady Ar gas flow with a flow rate of 100 sccm.

**Preparation of control catalyst CoS<sub>2</sub> PCNW.** CoS<sub>2</sub>/CC was prepared in parallel by the same method as Fe-CoS<sub>2</sub>/CC except for no addition of ferric chloride.

**Preparation of control catalyst P-CoS<sub>2</sub> PCNW.** P-CoS<sub>2</sub>/CC was prepared through the

same process as Fe/P-CoS<sub>2</sub> except for using CoS<sub>2</sub>/CC as precursor instead of Fe-CoS<sub>2</sub>/CC.

### **Material characterization.**

Morphology characterization was conducted using a Hitachi S-4800 field emission scanning electron microscope (FESEM) operated at 10 kV. Transmission electron microscopy (TEM) and high resolution TEM (HRTEM) images were recorded on a JEOL-2100F microscope operating at 200 kV. Elemental mapping was performed with an EDS detector equipped on the JEOL-2100F TEM. X-ray diffraction (XRD) experiments were carried out on a PANalytical high resolution X-ray diffraction system (model EMPYREAN) with a Cu K $\alpha$  radiation ( $\lambda = 0.15406$  nm). X-ray photoelectron spectroscopy (XPS) was recorded on a Thermo Scientific ESCALab250Xi using 300 W monochromated Mg K $\alpha$  radiation. The binding energies were referenced to the C1s line at 284.8 eV from adventitious carbon. The Raman spectra were recorded on a LabRAM HR Evolution spectroscope (HORIBA, France).

### **Electrochemical measurement.**

All electrochemical measurements were performed on a CHI 660E bipotentiostat in a standard three-electrode setup. In a typical measurement, Fe/P co-doped CoS<sub>2</sub>/CC hybrid electrode (0.5  $\times$  0.5 cm) was used as a working electrode, a graphite rod as the counter electrode, and a mercuric oxide electrode (MOE) as the reference electrode in 0.5 M H<sub>2</sub>SO<sub>4</sub>. The loading of catalyst on the electrode is 14.5, 15.7, 14.3, 14.1 mg cm<sup>-2</sup> for CoS<sub>2</sub>, Fe-CoS<sub>2</sub>, P-CoS<sub>2</sub> and Fe/P-CoS<sub>2</sub>, respectively and commercial Pt/C catalyst (20 wt.% Pt, Johnson Matthey) with a loading of 0.35 mg cm<sup>-2</sup> were also measured for comparison. The electrochemical analysis was performed through linear sweep voltammograms at a scan rate of 5 mV s<sup>-1</sup>. Cyclic voltammetry (CV) measurements were applied to probe the electrochemical double layer capacitance at

non-Faradaic region for estimating the effective electrochemical surface area (ECSA).

**Calculation of active sites.** The voltammetric charges (cathodic and anodic) of active components can be obtained from the CV curves recorded between 0.16 V and 0.23 V vs. RHE in 0.5 M H<sub>2</sub>SO<sub>4</sub> at a scan rate of 90 mV s<sup>-1</sup>. The number of active sites (n) of the catalysts was got at non-Faradaic region according the following equation:<sup>1-3</sup>

$$n = \frac{Q}{2F}$$

F: Faraday constant (96485 C/mol)

Q: Whole charge of CV curve (C)

**Assessment of turnover frequency (TOF).** When the number of active sites is obtained, the per-site turnover frequencies (in s<sup>-1</sup>) were calculated with the following equation:<sup>1-3</sup>

$$\text{TOF} = \frac{I}{2Fn}$$

I: Current during the linear sweep measurement (A) at a given overpotential

n: Number of active sites (mol)

## References:

- 1 Y. Yan, X. Ge, Z. Liu, J.-Y. Wang, J.-M. Lee and X. Wang, *Nanoscale*, 2013, **5**, 7768-7771.
- 2 J. Yin, P. Zhou, L. An, L. Huang, C. Shao, J. Wang, H. Liu and P. Xi, *Nanoscale*, 2016, **8**, 1390-1400.
- 3 J. Zhang, W. Xiao, P. Xi, S. Xi, Y. Du, D. Gao and J. Ding, *ACS Energy Lett.*, 2017, **2**, 1022-1028.

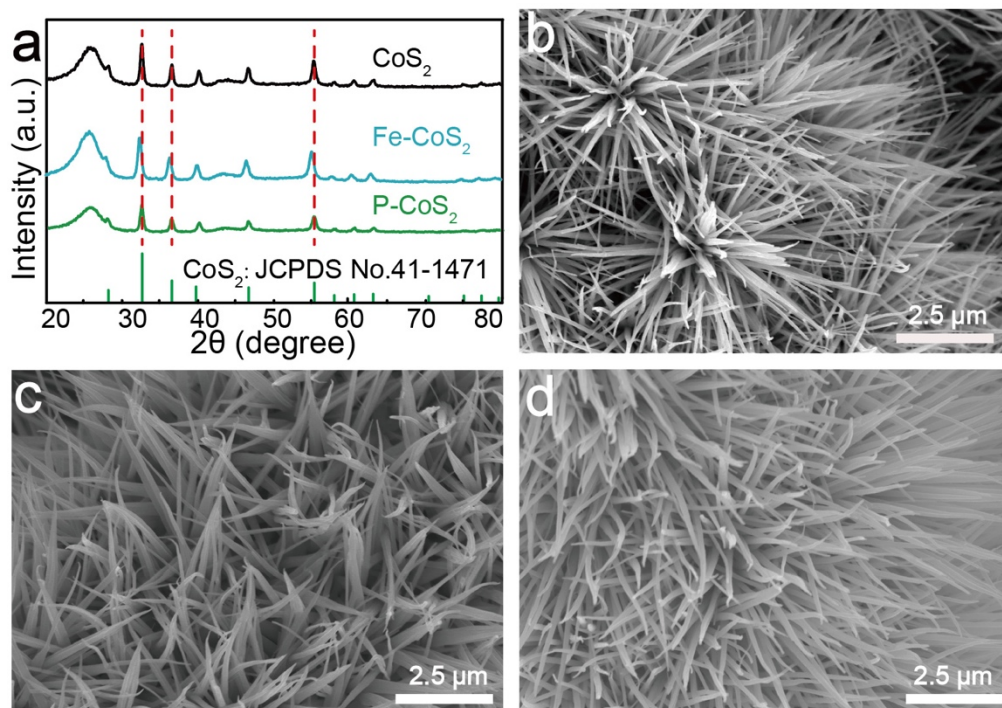

**Fig. S1** (a) XRD patterns of  $\text{CoS}_2$ ,  $\text{Fe-CoS}_2$ , and  $\text{P-CoS}_2$  PCNWs. Low-magnification SEM images of (b)  $\text{CoS}_2$ , (c)  $\text{Fe-CoS}_2$ , and (d)  $\text{P-CoS}_2$  PCNWs.

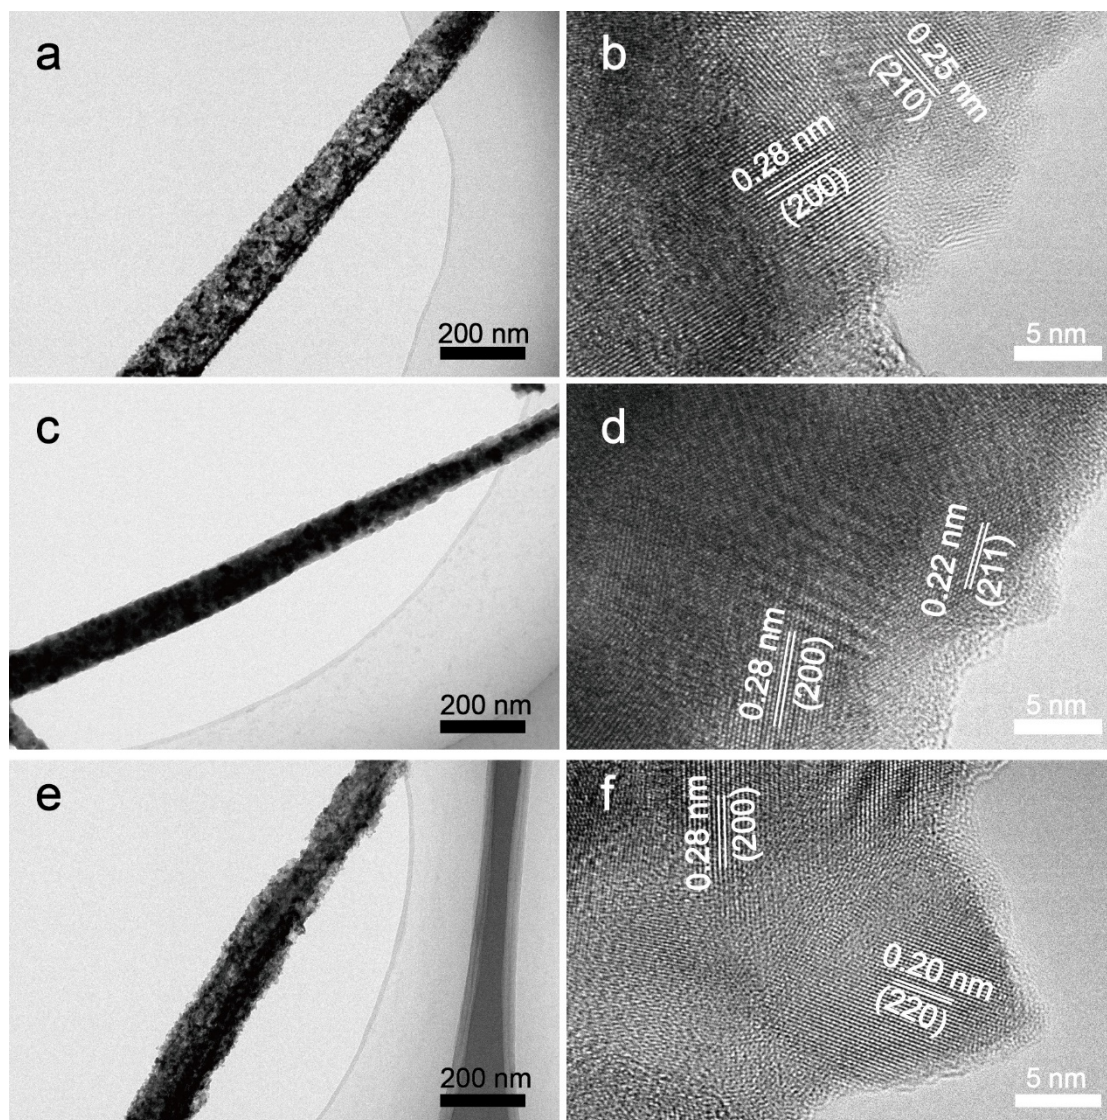

**Fig. S2** TEM and HRTEM images of (a, b) CoS<sub>2</sub>, (c, d) Fe-CoS<sub>2</sub>, and (e, f) P-CoS<sub>2</sub>.

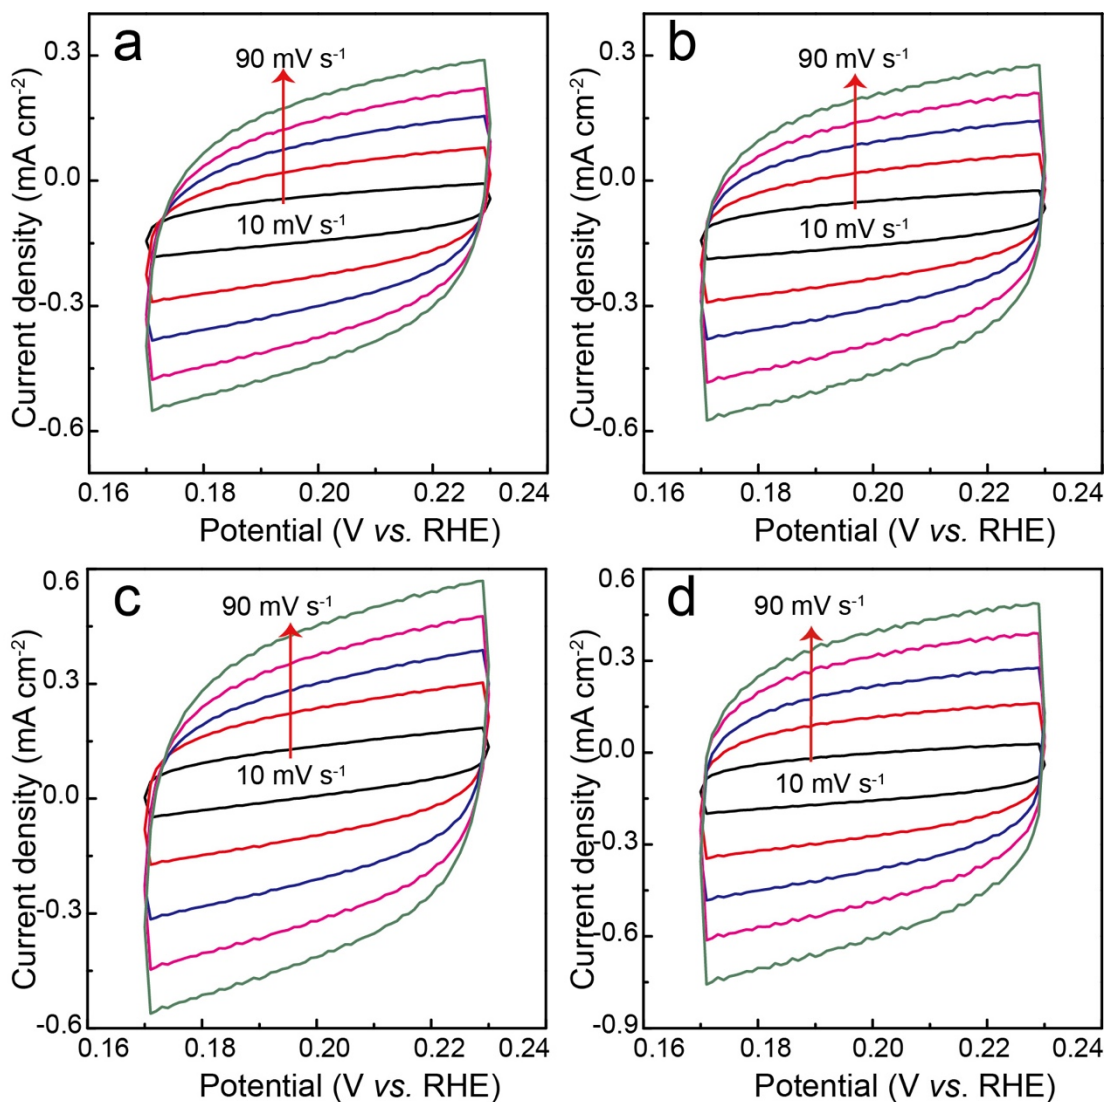

**Fig. S3** CV curves measured at different scan rates from 10, 30, 50, 70 to 90 mV s<sup>-1</sup> in 0.5 M H<sub>2</sub>SO<sub>4</sub> for (a) CoS<sub>2</sub>, (b) P-CoS<sub>2</sub>, (c) Fe-CoS<sub>2</sub>, and (d) Fe/P-CoS<sub>2</sub>.

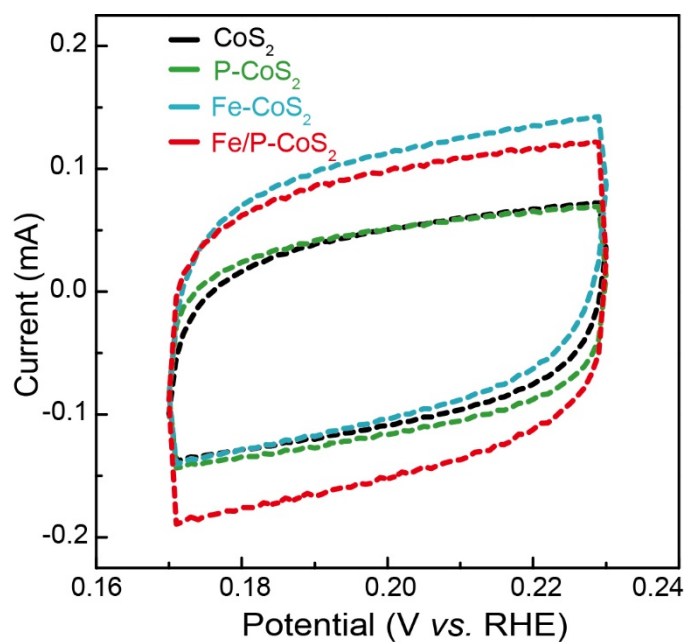

**Fig. S4** CV curves measured between 0.16 V and 0.23 V (vs. RHE) in 0.5 M H<sub>2</sub>SO<sub>4</sub> at a scan rate of 90 mV s<sup>-1</sup> for CoS<sub>2</sub>, P-CoS<sub>2</sub>, Fe-CoS<sub>2</sub>, and Fe/P-CoS<sub>2</sub>.

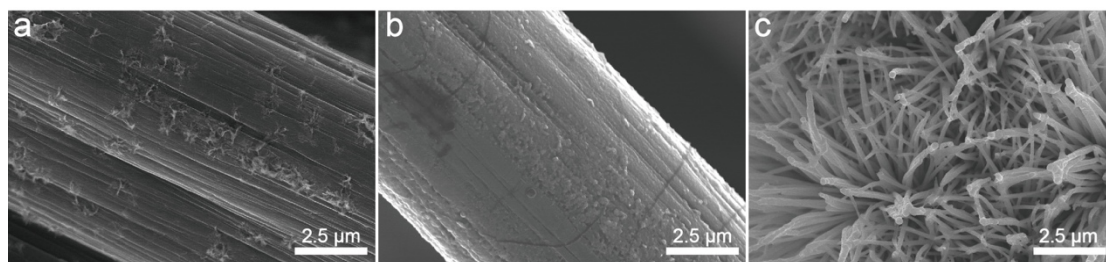

**Fig. S5** SEM images for (a) CoS<sub>2</sub>, (b) Fe-CoS<sub>2</sub>, and (c) P-CoS<sub>2</sub> after stability test.

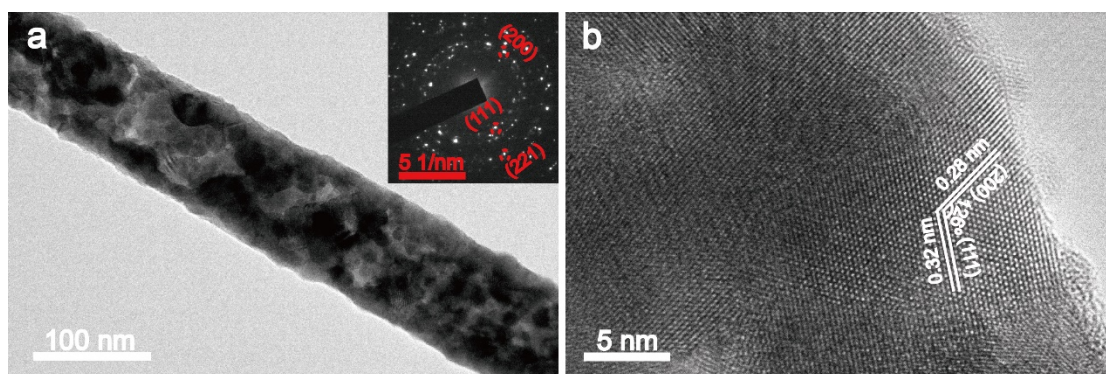

**Fig. S6** (a) TEM and (b) HRTEM images for Fe/P-CoS<sub>2</sub> after consecutive hydrogen evolution for 10 h at a current density of 25 mA cm<sup>-2</sup>. Inset in (a) is a corresponding SAED pattern.



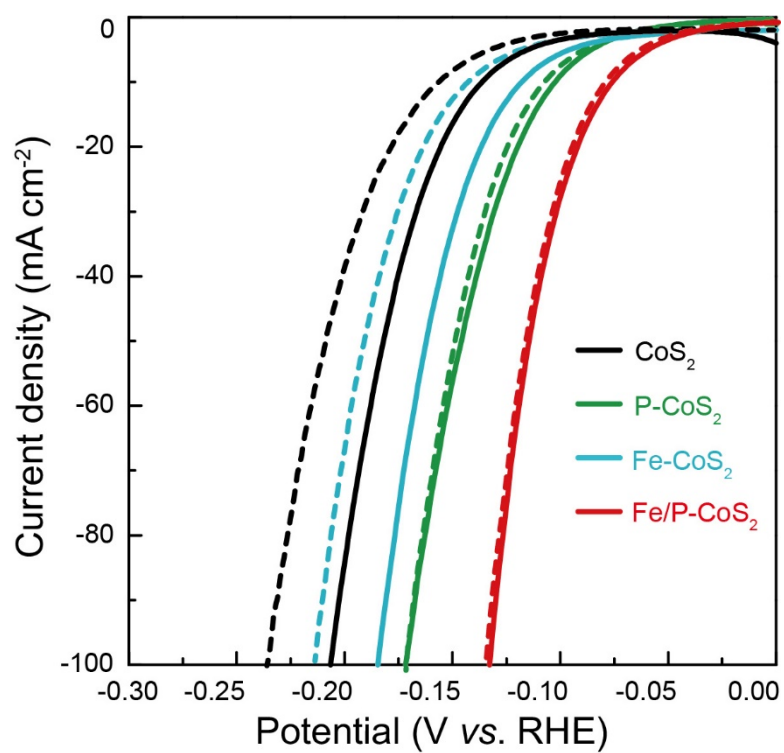

**Fig. S7** LSV curves recorded with iR correction for CoS<sub>2</sub>, Fe-CoS<sub>2</sub>, P-CoS<sub>2</sub> and Fe/P-CoS<sub>2</sub> before and after 2000 cycles of CV scanning between 0 and -300 mV (vs. RHE).

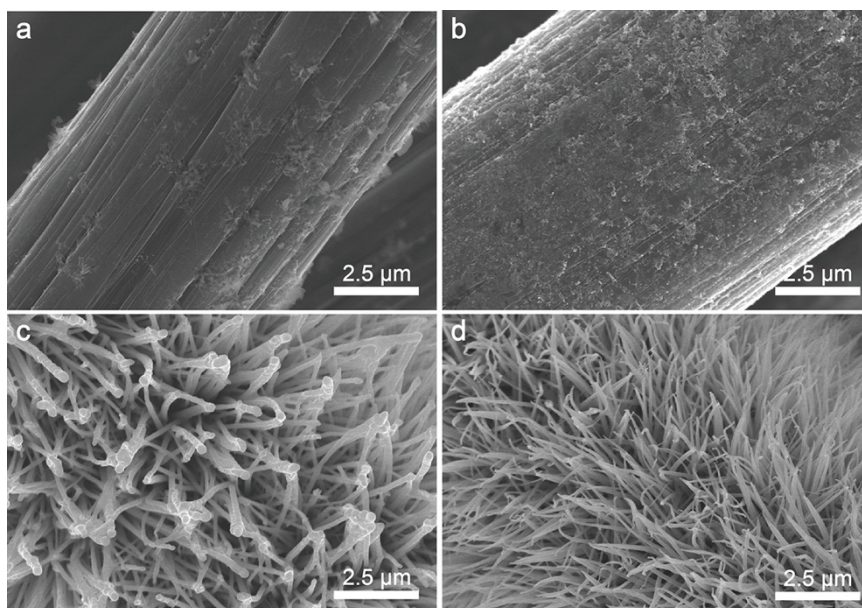

**Fig. S8** SEM images of (a) CoS<sub>2</sub>, (b) Fe-CoS<sub>2</sub>, (c) P-CoS<sub>2</sub>, and (d) Fe/P-CoS<sub>2</sub> after 2000 CV scans.

**Table S1.** Elemental contents of different catalysts calculated from XPS spectra.

| <b>Catalysts</b>            | <b>Co (at.%)</b> | <b>S (at.%)</b> | <b>P (at.%)</b> | <b>Fe (at.%)</b> |
|-----------------------------|------------------|-----------------|-----------------|------------------|
| <b>CoS<sub>2</sub></b>      | 20.5             | 79.5            | -               | -                |
| <b>P-CoS<sub>2</sub></b>    | 21.7             | 49.2            | 29.1            | -                |
| <b>Fe-CoS<sub>2</sub></b>   | 20.7             | 77.3            | -               | 2.0              |
| <b>Fe/P-CoS<sub>2</sub></b> | 21.5             | 52.9            | 23.6            | 2.0              |

**Table S2.** Comparison of HER activity of different catalysts.

| <b>Catalysts</b>            | <b>Overpotential<br/>(mV at 10 mA cm<sup>-2</sup>)</b> | <b>Tafel slope<br/>(mV dec<sup>-1</sup>)</b> | <b>TOF<br/>(s<sup>-1</sup> at -0.12 V)</b> |
|-----------------------------|--------------------------------------------------------|----------------------------------------------|--------------------------------------------|
| <b>CoS<sub>2</sub></b>      | 137                                                    | 90                                           | 0.17                                       |
| <b>P-CoS<sub>2</sub></b>    | 104                                                    | 57                                           | 0.55                                       |
| <b>Fe-CoS<sub>2</sub></b>   | 118                                                    | 73                                           | 0.17                                       |
| <b>Fe/P-CoS<sub>2</sub></b> | 80                                                     | 56                                           | 1.03                                       |

**Table S3.** EIS results of different catalysts.

| <b>Catalysts</b>            | <b>R<sub>s</sub> (Ω)</b> | <b>R<sub>ct</sub> (Ω)</b> |
|-----------------------------|--------------------------|---------------------------|
| <b>CoS<sub>2</sub></b>      | 2.10                     | 87.4                      |
| <b>P-CoS<sub>2</sub></b>    | 1.74                     | 49                        |
| <b>Fe-CoS<sub>2</sub></b>   | 1.26                     | 27                        |
| <b>Fe/P-CoS<sub>2</sub></b> | 2.06                     | 10.9                      |

**Table S4.** HER activity comparison of CoS<sub>2</sub> based catalysts.

| Electrocatalysts                                                       | Overpotential (mV)<br>at 10 mA cm <sup>-2</sup> | Tafel slop<br>(mV dec <sup>-1</sup> ) | Electrolyte                          | Ref.                                               |
|------------------------------------------------------------------------|-------------------------------------------------|---------------------------------------|--------------------------------------|----------------------------------------------------|
| <b>Fe/P-CoS<sub>2</sub></b>                                            | 80                                              | 56                                    | 0.5 M H <sub>2</sub> SO <sub>4</sub> | This work                                          |
| <b>CoS<sub>2</sub> NW</b>                                              | 145                                             | 51.6                                  | 0.5 M H <sub>2</sub> SO <sub>4</sub> | <i>J. Am. Chem. Soc.</i> ,<br>2014, 136, 10053     |
| <b>CoS<sub>2</sub>/RGO-CNT</b>                                         | 142                                             | 82                                    | 0.5 M H <sub>2</sub> SO <sub>4</sub> | <i>Angew. Chem. Int.<br/>Ed.</i> , 2014, 53, 12594 |
| <b>CoS<sub>2</sub>@MoS<sub>2</sub>/RG<br/>O</b>                        | 98                                              | 37.4                                  | 0.5 M H <sub>2</sub> SO <sub>4</sub> | <i>Adv. Funct. Mater.</i> ,<br>2017, 1602699       |
| <b>Ni-doped CoS<sub>2</sub></b>                                        | 156                                             | 52                                    | 0.5 M H <sub>2</sub> SO <sub>4</sub> | <i>Electrochim. Acta</i> ,<br>2017, 228, 428-435   |
| <b>CoS<sub>2</sub>@WS<sub>2</sub>/CC</b>                               | 97.2                                            | 66                                    | 0.5 M H <sub>2</sub> SO <sub>4</sub> | <i>J. Mater. Chem. A</i> ,<br>2017, 5, 15552       |
| <b>CoS<sub>2</sub>/CoSe<sub>2</sub></b>                                | 80                                              | 33.6                                  | 0.5 M H <sub>2</sub> SO <sub>4</sub> | <i>J. Mater. Chem. A</i> ,<br>2017, 5, 2504        |
| <b>CoS<sub>2</sub> NA/Ti</b>                                           | 140                                             | 107                                   | 1.0 M KOH<br>+ 0.3 M urea            | <i>Electrochim. Acta</i> ,<br>2017, 246, 776       |
| <b>CNF@CoS<sub>2</sub></b>                                             | 110                                             | 66.8                                  | 0.5 M H <sub>2</sub> SO <sub>4</sub> | <i>Inorg. Chem. Front.</i> ,<br>2016, 3, 1280      |
| <b>Co<sub>1-x</sub>V<sub>x</sub>SP</b>                                 | 55                                              | 50                                    | 0.5 M H <sub>2</sub> SO <sub>4</sub> | <i>Adv. Energy Mater.</i> ,<br>2018, 1702139       |
| <b>N-doped CoS<sub>2</sub></b>                                         | 57                                              | 48                                    | 0.5 M H <sub>2</sub> SO <sub>4</sub> | <i>ACS Energy Lett.</i> ,<br>2017, 2, 1022         |
| <b>Ni-doped CoS<sub>2</sub><br/>nanoneedle</b>                         | 350 mV at 30 mA cm <sup>-2</sup>                | 76                                    | 1 M KOH                              | <i>Catalysts</i> , 2017, 7,<br>366                 |
| <b>CoS P/CNT</b>                                                       | 48                                              | 55                                    | 0.5 M H <sub>2</sub> SO <sub>4</sub> | <i>Nat. Commun.</i> , 2016,<br>7, 10771            |
| <b>CoS<sub>2</sub>-CFN</b>                                             | 136                                             | 73                                    | 0.5 M H <sub>2</sub> SO <sub>4</sub> | <i>Catal. Sci. Technol.</i> ,<br>2016, 6, 4545-    |
| <b>CoS<sub>2</sub><br/>nanopyramid<br/>array</b>                       | 70                                              | 64.5                                  | 0.5 M H <sub>2</sub> SO <sub>4</sub> | <i>J. Mater. Chem. A</i> ,<br>2015, 3, 6306        |
| <b>P-doped CoS<sub>2</sub></b>                                         | 67                                              | 50                                    | 0.5 M H <sub>2</sub> SO <sub>4</sub> | <i>Chem. Commun.</i> ,<br>2015, 51, 14160          |
| <b>Fe<sub>0.54</sub>Co<sub>0.46</sub>S<sub>0.92</sub>/C<br/>NTs/CC</b> | 70                                              | 64                                    | 1 M KOH                              | <i>ACS Energy Lett.</i> ,<br>2017, 2, 2778         |
| <b>CoS<sub>2x</sub>Se<sub>2(1-x)</sub></b>                             | 129.5                                           | 44                                    | 0.5 M H <sub>2</sub> SO <sub>4</sub> | <i>Nanoscale</i> , 2016, 8,<br>4699                |
